# Supplementary material for: Stable and fluctuating temperature effects on the development rate and survival of two malaria vectors, Anopheles arabiensis and Anopheles funestus
Source: PubMed Central journal article supplement (PMC3637585; doi:10.1186/1756-3305-6-104), 2013-04-16

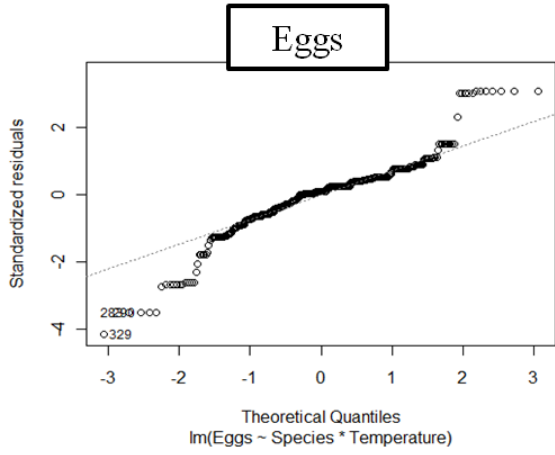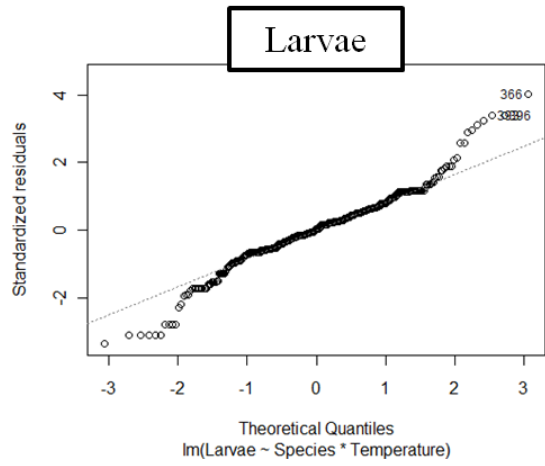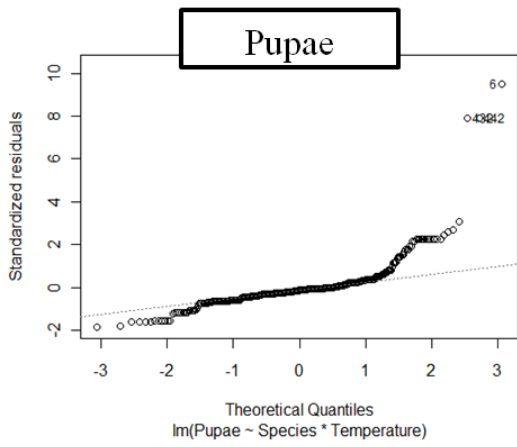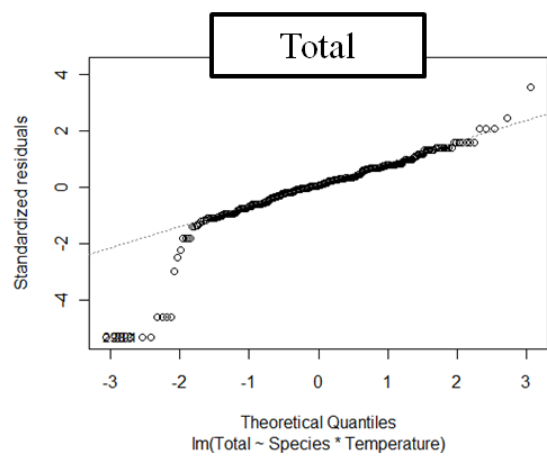

Supplement: 1756-3305-6-104-S3.pdf [file 1756-3305-6-104-S3.pdf]
