# Supplementary material for: Stable and fluctuating temperature effects on the development rate and survival of two malaria vectors, Anopheles arabiensis and Anopheles funestus
Source: PubMed Central journal article supplement (PMC3637585; doi:10.1186/1756-3305-6-104), 2013-04-16

**Equation:**  $y=a+bx^{0.5}+cx+dx^{1.5}+ex^2+fx^{2.5}+gx^3$   
 $a=-4255.7; b=5401.3; c=-2845.3; d=796.2; e=-124.9; f=10.4; g=-0.4$

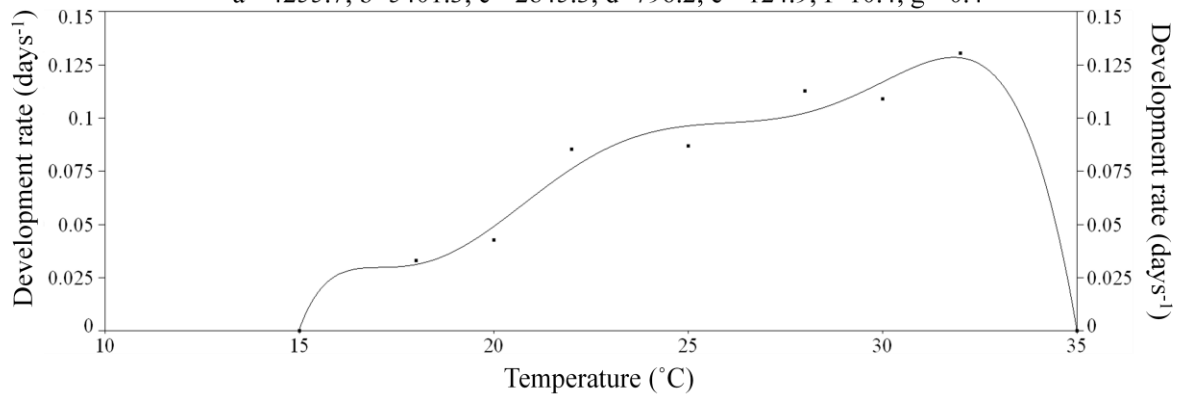

Supplement: 1756-3305-6-104-S5.pdf [file 1756-3305-6-104-S5.pdf]
