# Supplementary material for: Stable and fluctuating temperature effects on the development rate and survival of two malaria vectors, Anopheles arabiensis and Anopheles funestus
Source: PubMed Central journal article supplement (PMC3637585; doi:10.1186/1756-3305-6-104), 2013-04-16

**Equation:  $y=a+bx+cx^2+dx^3+ex^4+fx^5+gx^6+hx^7$**

$a=-26.156454$   $b=6.8541473$   $c=-0.73588271$   $d=0.041306606$

$e=-0.001$ ;  $f=1.9\text{exp-}05$ ;  $g=-1.1\text{exp-}07$ ;  $h=-3.1\text{exp-}10$

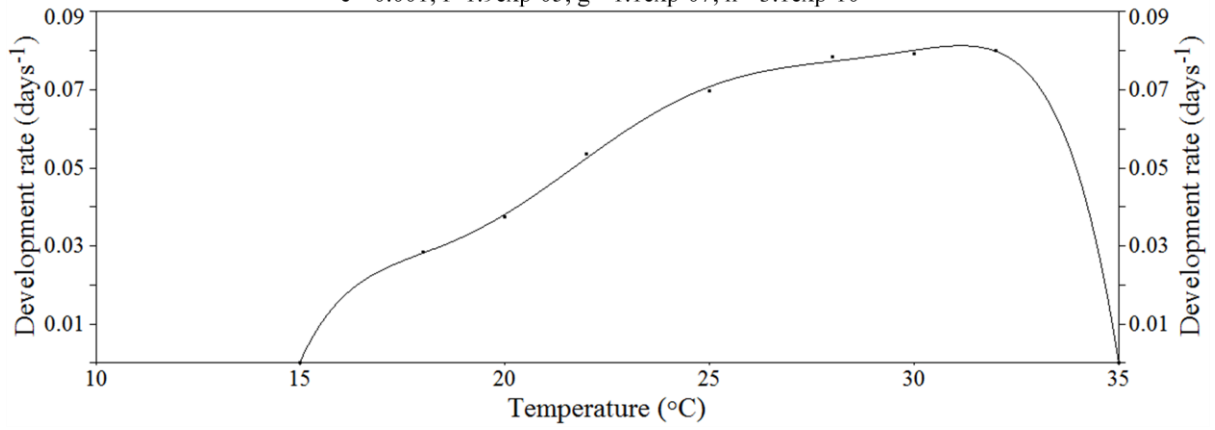

Supplement: 1756-3305-6-104-S6.pdf [file 1756-3305-6-104-S6.pdf]
