# Supplementary material for: Stable and fluctuating temperature effects on the development rate and survival of two malaria vectors, Anopheles arabiensis and Anopheles funestus
Source: PubMed Central journal article supplement (PMC3637585; doi:10.1186/1756-3305-6-104), 2013-04-16

**Equation:**  $y=a+bx+cx^2+dx^3+ex^4+fx^5+gx^6+hx^7+ix^8$   
a=-1099.7968 b=375.52733 c=-55.742459 d=4.6978548 e=-0.24584153  
f=0.0081791652 g=-0.00016893487 h=1.9803303e-06 i=-1.0087126e-08

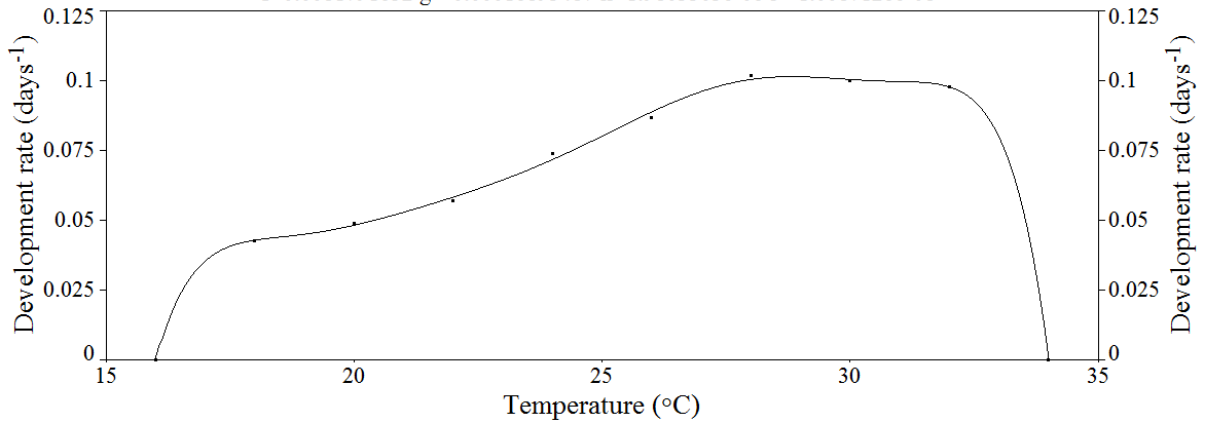

Supplement: 1756-3305-6-104-S7.pdf [file 1756-3305-6-104-S7.pdf]
